# Supplementary material for: Heterochromatin and microsatellites detection in karyotypes of four sea turtle species: Interspecific chromosomal differences
Source: PubMed Central journal article supplement (PMC7734918; doi:10.1590/1678-4685-gmb-2020-0213), 2020-12-02
Supplement: 1415-4757-GMB-43-4-e20200213-s1.pdf [file 1415-4757-GMB-43-4-e20200213-s1.pdf]

## Supplementary Material to “Heterochromatin and microsatellites detection in karyotypes of four sea turtle species: Interspecific chromosomal differences”

**Table S1.** Data of the sea turtle species sampled in Brazilian coast or obtained in captive condition. The GPS refers just to place of sample obtention.

| Species                       | Samples                  | Condition | Localities                           | GPS                         |
|-------------------------------|--------------------------|-----------|--------------------------------------|-----------------------------|
| <i>Chelonia mydas</i>         | 3 juveniles              | Captive   | Aquário Natal; Extremoz – RN         | 5°43'53" S;<br>35°12'16" W  |
|                               | 15 juveniles             | Wild      | Cobras Island; Pontal do Sul – PR    | 25°28'55" S;<br>48°25'56" W |
|                               | 1 ♀ and 8 juveniles      | Captive   | Projeto TAMAR; Mata de São João - BA | 12°34'38" S;<br>38°00'07" W |
| <i>Caretta caretta</i>        | 1 ♂ and 2 ♀              | Captive   | Projeto TAMAR; Florianópolis – SC    | 27°34'19" S;<br>48°25'40" W |
|                               | 1 ♂, 3 ♀ and 5 juveniles | Captive   | Projeto TAMAR; Mata de São João - BA | 12°34'38" S;<br>38°00'07" W |
| <i>Eretmochelys imbricata</i> | 2 ♀                      | Wild      | Minas Beach; Tibau do Sul – RN       | 6°14'27" S;<br>35°02'16" W  |
|                               | 4 juveniles              | Captive   | Projeto TAMAR; Mata de São João - BA | 12°34'38" S;<br>38°00'07" W |
| <i>Lepidochelys olivacea</i>  | 3 juveniles              | Captive   | Aquário Natal; Extremoz – RN         | 5°43'53" S;<br>35°12'16" W  |
|                               | 1 ♂ and 2 juveniles      | Captive   | Projeto TAMAR; Mata de São João - BA | 12°34'38" S;<br>38°00'07" W |

Note: BA = Bahia state; RN = Rio Grande do Norte state; PR = Paraná state; SC = Santa Catarina state.
